# Supplementary material
Source: Springer Nature journal article supplement (https://www.springermedizin.de/resource/supplementary/12885_2011_2765_MOESM1_ESM.pdf/9461836)

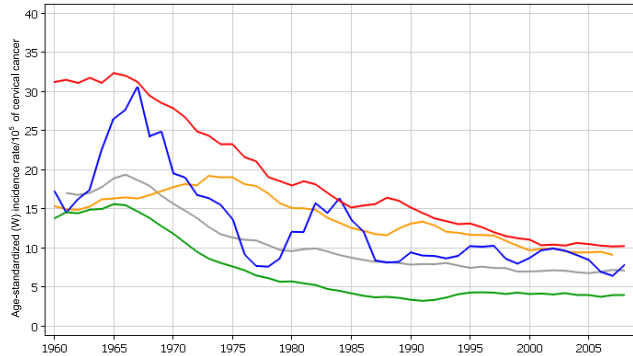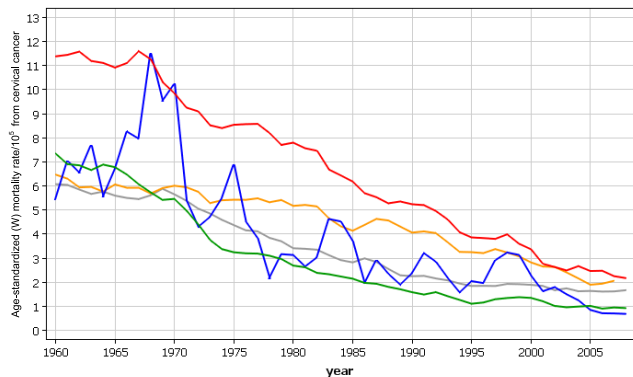

■ Denmark
 ■ Finland
 ■ Iceland
 ■ Norway
 ■ Sweden

Supplement: MOESM1 [file 9461836]
